# Supplementary material
Source: PubMed Central journal article supplement (PMC5031528)
Supplement: NIHMS805231-supplement-Supplemental_Material.pdf [file NIHMS805231-supplement-Supplemental_Material.pdf]

## SUPPLEMENTAL MATERIAL

**Supplemental Table 1. APPEAR study sites**

| <b>Clinic Name</b>                               | <b>Location</b>   | <b>Number of Physicians Participating</b> | <b>Number of Patients Enrolled</b> |
|--------------------------------------------------|-------------------|-------------------------------------------|------------------------------------|
| Advanced Cardiovascular Specialists              | Beaumont, TX      | 8                                         | 50                                 |
| Alaska Heart Institute                           | Anchorage, AK     | 10                                        | 26                                 |
| Arizona Cardiology Group                         | Phoenix, AZ       | 8                                         | 52                                 |
| Arkansas Cardiology                              | Little Rock, AK   | 1                                         | 50                                 |
| Cardiology Consultants                           | Toms River, NJ    | 4                                         | 50                                 |
| Cardiology Consultants of Philadelphia (2 sites) | Philadelphia, PA  | 12                                        | 100                                |
| Cardiovascular Consultants of Cape Cod           | Cape Cod, MA      | 5                                         | 50                                 |
| Cardiovascular Medical Associates                | Downey, CA        | 4                                         | 50                                 |
| First Coast Cardiovascular Institute             | Jacksonville, FL  | 4                                         | 50                                 |
| Greenwich Cardiology Associates                  | Greenwich, CT     | 1                                         | 50                                 |
| INTEGRIS Baptist Medical Center                  | Oklahoma City, OK | 17                                        | 51                                 |
| Krannert Institute of Cardiology                 | Indianapolis, IN  | 4                                         | 50                                 |
| Michigan Heart Group                             | Troy, MI          | 4                                         | 50                                 |
| Missouri Cardiovascular Specialists              | Columbia, MO      | 9                                         | 50                                 |
| Parkview Research Center                         | Fort Wayne, IN    | 9                                         | 49                                 |
| ProMedica Toledo Hospital                        | Toledo, OH        | 5                                         | 50                                 |
| Rapeport Medical Corporation                     | La Mesa, CA       | 2                                         | 50                                 |
| Saint Luke's Cardiovascular Consultants          | Kansas City, MO   | 13                                        | 70                                 |
| Sigal Heart Center                               | Tyler, TX         | 2                                         | 55                                 |
| Southern Oregon Cardiology                       | Medford, OR       | 9                                         | 50                                 |
| Swedish Heart & Vascular                         | Seattle, WA       | 4                                         | 56                                 |
| UnityPoint Clinic Cardiology                     | Cedar Rapids, IA  | 7                                         | 50                                 |
| Virtua - The Cardiology Group                    | Marlton, NJ       | 12                                        | 50                                 |
| W. Spencer Tilley, Jr.                           | Greensboro, NC    | 1                                         | 50                                 |

Supplemental Figure 1. APPEAR Study Sites

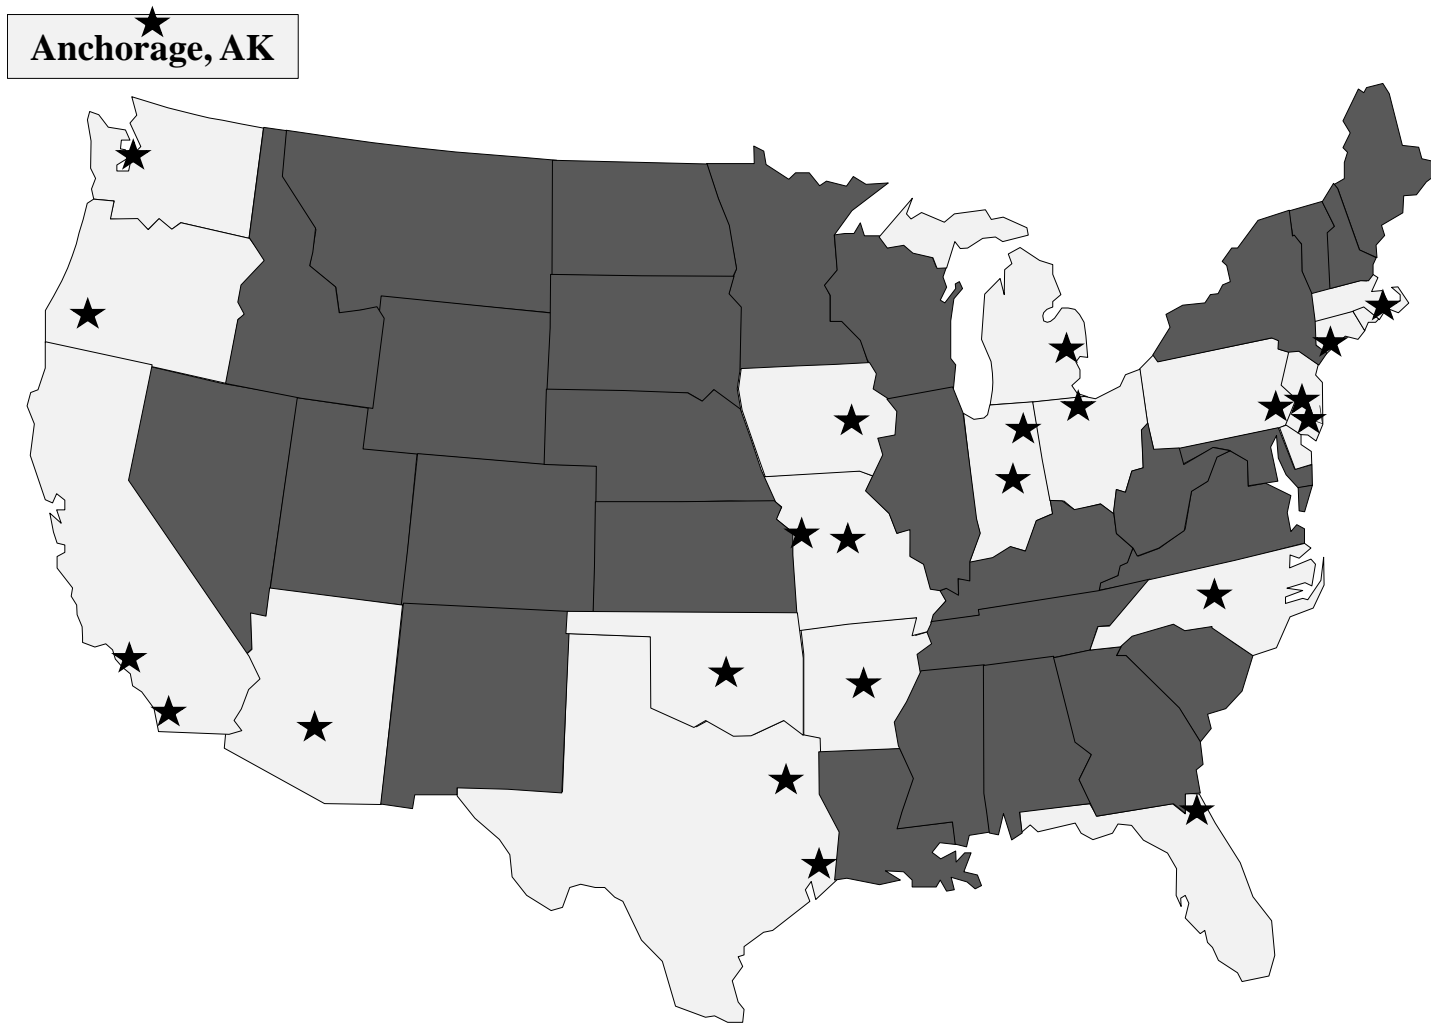

**Supplemental Table 2. Physician descriptions of patient's symptoms, among patients whose angina was appropriately recognized**

|                            |                                   | <b>Recognized Angina<br/>n=238</b> |
|----------------------------|-----------------------------------|------------------------------------|
| <hr/>                      |                                   |                                    |
| Category of symptoms       |                                   |                                    |
|                            | Typical angina                    | 45.8%                              |
|                            | Atypical angina                   | 38.2%                              |
|                            | Non-cardiac chest pain            | 16.0%                              |
| Associated symptoms        |                                   |                                    |
|                            | Dyspnoea                          | 43.5%                              |
|                            | Nausea                            | 3.4%                               |
|                            | Confusion                         | 0.4%                               |
|                            | Light-headedness                  | 3.4%                               |
|                            | Sweating                          | 3.8%                               |
|                            | Other                             | 9.2%                               |
| Provocation/relief factors |                                   |                                    |
|                            | Provoked by exertion              | 68.8%                              |
|                            | Provoked by emotional stress      | 28.3%                              |
|                            | Relieved by rest                  | 66.2%                              |
|                            | Relieved by short-acting nitrates | 41.8%                              |
| <hr/>                      |                                   |                                    |
